# Supplementary material for: Trends in healthy weight prevalence among adults in Chongqing, China， 2013-2023: Findings from 4 consecutive representative cross-sectional surveys
Source: Research Square preprint supplement (doi:10.21203/rs.3.rs-7480390/v1), 2025-09-17
Supplement: Supplementary file 1 [file 0367dd9c9b0ff3d407ca503c.docx]

| **Supplementary Tables**  Table S1. The prevalence of overweight and obesity among adults in Chongqing, 2013–2023 | | | | | | |
| --- | --- | --- | --- | --- | --- | --- |
|  | **2013** | **2015** | **2018** | **2023** | **Annual rate of change** | ***P*** |
| **Overall** | 39.9(36.8-43) | 41.2(38.8-43.6) | 46.4(43.2-49.6) | 49.4(44-54.8) | 1.00 | <0.05 |
| **Sex** |  |  |  |  |  |  |
| Men | 38(33.2-42.8) | 41.9(38.2-45.6) | 48.7(43.5-53.9) | 54.4(45.6-63.1) | 1.64 | <0.05 |
| Women | 41.8(37.9-45.6) | 40.5(37.4-43.5) | 44.1(40.3-48) | 44.4(38.7-50) | 0.35 | 0.3 |
| **Areas** |  |  |  |  |  |  |
| Urban | 39.6(31.3-47.9) | 34(28.6-39.4) | 43.7(35.3-52.1) | 44.4(34.5-54.4) | 0.85 | 0.16 |
| Rural | 39.9(36.6-43.2) | 42(39.4-44.7) | 46.9(43.4-50.3) | 49.8(44-55.5) | 1.00 | <0.05 |
| **Age,** years |  |  |  |  |  |  |
| 18~45 | 39.5(34-45.1) | 42(37.6-46.3) | 47.9(42-53.8) | 51(40.9-61.1) | 1.18 | <0.05 |
| 45~65 | 52.5(49.6-55.4) | 52.8(50.1-55.5) | 58.3(55.5-61.1) | 61.2(57.4-65.1) | 0.95 | <0.05 |
| 65+ | 12.8(10.7-14.9) | 12.5(10.5-14.6) | 14.5(12.3-16.7) | 17.1(14.5-19.7) | 0.46 | <0.05 |
| **Education** |  |  |  |  |  |  |
| Not formal/ primary school | 38.2(35.3-41) | 41.2(38.4-44.1) | 43.3(39.8-46.8) | 46(42.3-49.6) | 0.76 | <0.05 |
| Secondary school | 41(34.4-47.6) | 43.1(38.3-48) | 51(44.3-57.8) | 57.8(49.7-65.8) | 1.75 | <0.05 |
| High school | 42.5(31.9-53.1) | 39.1(31.2-47) | 50.1(40.6-59.6) | 54.1(36.3-72) | 1.38 | 0.19 |
| College/ university | 42(26.5-57.5) | 38.3(29.3-47.4) | 43.5(31.8-55.2) | 42.3(28.6-56) | 0.18 | 0.85 |
| **Occupation** |  |  |  |  |  |  |
| Agriculture | 36(32.6-39.5) | 40.1(37.1-43.1) | 42.5(38.6-46.4) | 48.4(43.6-53.3) | 1.20 | <0.05 |
| Manufacture | 31.5(21.6-41.4) | 39.7(22.8-56.6) | 51.5(23.1-79.9) | 64.2(38.5-89.9) | 3.31 | <0.05 |
| Service provider | 55.6(41-70.3) | 50.5(40.9-60) | 59.9(49.4-70.4) | 74.1(59.9-88.2) | 2.23 | <0.05 |
| Managers/ professionals | 43.5(34.2-52.8) | 39.9(31.3-48.5) | 44(33-55) | 42.9(31.2-54.6) | 0.07 | 0.92 |
| Unemployed/ students | 43.8(35.2-52.4) | 45.5(40.1-50.9) | 49.3(42.9-55.7) | 44.7(34.6-54.8) | 0.05 | 0.93 |
| Others | 36.1(26.5-45.8) | 34.7(29.1-40.4) | 47.2(38.1-56.3) | 44.9(36.7-53.1) | 1.15 | <0.05 |
