# Supplementary material for: Trends in healthy weight prevalence among adults in Chongqing, China， 2013-2023: Findings from 4 consecutive representative cross-sectional surveys
Source: Research Square preprint supplement (doi:10.21203/rs.3.rs-7480390/v1), 2025-09-17
Supplement: Supplementary file 2 [file c20025bcea34f9580e5d3f51.docx]

| Table S2. The prevalence of central obesity among adults in Chongqing, 2013–2023 | | | | | | |
| --- | --- | --- | --- | --- | --- | --- |
|  | **2013** | **2015** | **2018** | **2023** | **Annual rate of change** | ***P*** |
| **Overall** | 29.4(26.4-32.5) | 28(25.8-30.2) | 37.4(34.4-40.4) | 31.6(27.2-35.9) | 0.37 | 0.16 |
| **Sex** |  |  |  |  |  |  |
| Men | 26.6(21.5-31.7) | 27(23.6-30.4) | 36(31.1-40.9) | 32.1(24.9-39.4) | 0.66 | 0.13 |
| Women | 32.3(28.8-35.9) | 29(26.3-31.7) | 38.7(35.2-42.3) | 31(26.4-35.6) | 0.07 | 0.8 |
| **Areas** |  |  |  |  |  |  |
| Urban | 17(11.8-22.2) | 25.6(20.7-30.4) | 24.7(17.1-32.2) | 38.9(29.5-48.2) | 1.88 | <0.05 |
| Rural | 30.6(27.3-33.9) | 28.3(25.9-30.7) | 39.5(36.2-42.7) | 31(26.5-35.6) | 0.23 | 0.4 |
| **Age,**years |  |  |  |  |  |  |
| 18~45 | 26.4(20.7-32.1) | 25.1(21.2-29) | 30.2(24.9-35.5) | 25(17.4-32.5) | -0.05 | 0.92 |
| 45~65 | 34.3(31.6-37) | 32.5(29.9-35) | 45.9(42.9-48.8) | 40.6(36.9-44.3) | 0.86 | <0.05 |
| 65+ | 29.2(26.1-32.2) | 27.2(24.6-29.9) | 43.1(39.9-46.3) | 33.7(30.6-36.9) | 0.72 | <0.05 |
| **Education** |  |  |  |  |  |  |
| Not formal/ primary school | 31.4(28.8-34) | 31.6(28.8-34.3) | 44(40.6-47.5) | 39.3(35.6-42.9) | 1.03 | <0.05 |
| Secondary school | 27.4(20-34.8) | 25(20.8-29.2) | 38.2(32.1-44.4) | 28.9(22.7-35.1) | 0.46 | 0.32 |
| High school | 31.3(20.8-41.8) | 22.4(16.1-28.7) | 33.9(24.9-42.9) | 26.9(14.4-39.4) | -0.12 | 0.88 |
| College/ university | 20.9(10.7-31.1) | 28.1(19.3-36.8) | 20.2(10.4-29.9) | 26.5(14.5-38.4) | 0.34 | 0.67 |
| **Occupation** |  |  |  |  |  |  |
| Agriculture | 26.4(23.7-29.2) | 27.3(24.8-29.9) | 39(35.2-42.7) | 36.4(31.4-41.3) | 1.33 | <0.05 |
| Manufacture | 23.2(14.6-31.9) | 15.5(7.6-23.3) | 34(11.3-56.7) | 18.2(3.4-33.1) | -0.14 | 0.88 |
| Service provider | 42.7(28.6-56.9) | 28.6(19.6-37.6) | 33(22.6-43.5) | 24.2(10.9-37.6) | -1.39 | 0.12 |
| Managers/ professionals | 26.1(19.5-32.7) | 31.4(23-39.7) | 20.2(13.3-27.1) | 24(15.2-32.9) | -0.40 | 0.47 |
| Unemployed/ students | 39.4(29.5-49.2) | 30.7(25.5-36) | 46(39.5-52.4) | 38.5(28.8-48.2) | 0.22 | 0.73 |
| Others | 18.7(12.1-25.4) | 25.8(20.7-30.9) | 39.3(30.5-48.2) | 34.6(27.7-41.5) | 1.53 | <0.05 |
